# Supplementary material for: EXOC1 plays an integral role in spermatogonia pseudopod elongation and spermatocyte stable syncytium formation in mice
Source: eLife. 2021 May 11;10:e59759. doi: 10.7554/eLife.59759 (PMC8112867; doi:10.7554/eLife.59759)
Supplement: Figure 3—source data 3. [file elife-59759-fig3-data3.xlsx]

## Sheet: Figure 3-source data 3
Occurrence rate of AGS per area in the extracted "Section containing AGS"
Mouse	Extracted Section	Area (µm2)	Number of AGS
Exoc1 cKO Mouse 1	1	9717.06	3
	4	10517.7	5
	8	8889.46	6
	9	5992.31	3
	14	13339.1	7
	53	16807.9	6
	55	9158.06	5
	52	12865	2
	35	10428.7	6
	32	9955.81	3
Exoc1 cKO Mouse 2	36	8281.68	2
	35	11502	11
	74	8067.61	2
	42	11455.5	6
	39	8113.52	2
	40	17603.3	6
	68	14622.4	2
	24	10832.2	5
	64	9811.18	8
	61	13981.3	8
Exoc1 cKO Mouse 2	59	11830.2	4
	48	8277.09	7
	37	12329.5	9
	62	10677.8	1
	24	11748.7	4
	23	10851.7	1
	8	15968.2	7
	45	7409.89	3
	44	6202.94	4
	43	7574.04	2
Snap23 cKO Mouse 1	1	9070.25	1
	2	19608	1
	3	6004.94	1
	4	30816.7	1
	5	6555.9	1
	6	40024.7	1
	7	34735.4	1
Snap23 cKO Mouse 2	1	12783.5	1
	2	24245.3	1
	3	21670.7	1
	4	15293.3	1
Snap23 cKO Mouse 3	1	34725.1	1
	2	72808.2	2
	3	18997.9	1
	4	34905.3	1
	5	13196.7	1
	6	51464.6	2
