# Supplementary material for: EXOC1 plays an integral role in spermatogonia pseudopod elongation and spermatocyte stable syncytium formation in mice
Source: eLife. 2021 May 11;10:e59759. doi: 10.7554/eLife.59759 (PMC8112867; doi:10.7554/eLife.59759)
Supplement: Figure 4—source data 1. [file elife-59759-fig4-data1.xlsx]

## Sheet: Figure 4-source data 1
Measurement of the length of the pseudopodia of GFRα1+ cells in section observation
Genotype	Mouse	GFRα1+ cell	Distance from the edge of the pseudopod to the center of the cell（µm）
Exoc1 cKO	#1	1	8
		2	6
		3	9
		4	8
		5	7
		6	8
		7	10
		8	10
		9	9
		10	8
	#2	1	10
		2	10
		3	8
		4	11
		5	11
		6	11
	#3	1	6
		2	9
		3	11
		4	13
		5	10
		6	9
		7	12
		8	9
		9	11
Wild-Type	#1	1	12
		2	9
		3	20
		4	14
		5	9
		6	19
		7	14
		8	11
		9	17
	#2	1	21
		2	14
		3	20
		4	11
		5	18
		6	11
		7	9
		8	20
		9	13
		10	17
		11	13
		12	12
		13	12
		14	15
		15	25
		16	12
	#3	1	22
		2	10
		3	23
		4	17
		5	21
		6	22
		7	20
		8	19
		9	17
Stx2 KO	#1	1	14
		2	16
		3	21
		4	10
		5	13
		6	11
	#2	1	14
		2	13
		3	20
		4	16
		5	10
		6	9
		7	19
		8	10
		9	17
		10	14
		11	11
		12	16
		13	14
		14	17
		15	14
		16	17
		17	15
		18	15
		19	14
	#3	1	13
		2	25
		3	10
		4	8
		5	10
		6	14
		7	11
		8	19
		9	9
		10	12
		11	7
