# Supplementary material for: EXOC1 plays an integral role in spermatogonia pseudopod elongation and spermatocyte stable syncytium formation in mice
Source: eLife. 2021 May 11;10:e59759. doi: 10.7554/eLife.59759 (PMC8112867; doi:10.7554/eLife.59759)
Supplement: Figure 4—source data 2. [file elife-59759-fig4-data2.xlsx]

## Sheet: Figure 4-source data 2
Measurement of the length of the pseudopodia of GFRα1+ cells in whole-mount observation
Genotype	Mouse	Asingle	Distance from the edge of the pseudopod to the center of the cell（µm）		Genotype	Mouse	Apair	Intercellular length in connected（µm）		Genotype	Mouse	Aaligned	Intercellular length in connected（µm）
Exoc1flox/-	#1	1	38.59		Exoc1flox/-	#1	1	37.766		Exoc1flox/-	#1	1	14.8738
		2	11.23				2	20.805				2	14.4648
		3	22.28				3	17.855				3	12.5312
		4	18.31				4	29.418				4	22.4223
		5	16.28				5	21.5				5	29.0411
		6	15.43				6	12.605				6	17.1049
		7	25.08				7	13.806				7	9.92827
		8	16.93				8	30.701				8	11.2297
		9	27.29				9	9.517				9	18.7038
		10	21.77				10	24.078				10	15.32
		11	19.87				11	14.728				11	14.8738
		12	19.36				12	15.466				12	17.8114
		13	32.14				13	19.771				13	17.0677
		14	20.05				14	17.94				14	11.3785
		15	14.43				15	7.84				15	37.8167
		16	22.49				16	12.984				16	30.4169
		17	13.26				17	19.217			#2	1	12.1965
		18	27.37				18	26.779				2	18.7782
		19	10.72				19	23.673				3	21.4927
		20	10.07				20	16.031				4	10.2257
	#2	1	18.37			#2	1	31.218				5	33.1686
		2	21.75				2	14.323				6	22.3851
		3	20.86				3	17.477				7	17.1792
		4	17.77				4	15.317				8	22.8685
		5	17.96				5	26.801				9	17.1792
		6	16.14				6	24.828				10	23.166
		7	13.16				7	40.26				11	10.2257
		8	19.89				8	17.811				12	12.5684
		9	18.59				9	32.636				13	15.4316
		10	32.13				10	17.114				14	28.1487
		11	36.03				11	34.607			#3	1	25.8432
		12	29.45				12	19.099				2	18.2948
		13	15.02				13	13.137				3	24.0584
		14	12.79				14	26.046				4	21.4555
		15	30.53				15	14.681				5	23.8725
		16	11.53				16	19.546				6	10.9322
		17	25.51				17	26.444				7	15.3572
		18	11.97				18	15.37				8	41.0145
		19	12.61				19	21.984				9	26.3638
		20	12.57				20	19.839				10	16.6959
	#3	1	23.46			#3	1	25.425				11	23.2403
		2	22.42				2	21.347				12	30.231
		3	19.71				3	16.929				13	16.4727
		4	19.3				4	19.772				14	24.8764
		5	16.18				5	21.366		Exoc1 cKO	#1	1	9.70516
		6	19.41				6	24.942				2	10.4117
		7	24.99				7	28.753				3	12.1593
		8	20.15				8	9.74				4	8.92428
		9	22.57				9	18.525				5	15.8778
		10	23.5				10	23.629				6	17.9229
		11	15.84				11	10.716				7	18.5923
		12	15.28				12	21.748				8	20.3027
		13	35.29				13	7.813				9	13.8326
		14	19.04				14	19.004				10	13.7955
		15	18.7				15	17.672				11	11.1925
		16	11.64				16	19.341				12	9.74234
		17	24.24				17	22.125				13	17.5883
		18	21.27				18	25.341				14	22.162
		19	15.43				19	23.586				15	18.7038
		20	24.65				20	25.229				16	19.8194
Exoc1 cKO	#1	1	12.74		Exoc1 cKO	#1	1	8.488				17	23.5006
		2	9.81				2	12.511				18	25.8432
		3	13.01				3	7.492				19	16.9933
		4	11.02				4	7.781			#2	1	8.58962
		5	6.89				5	18.493				2	6.91632
		6	12.44				6	9.03				3	12.0478
		7	8.97				7	12.377				4	7.51127
		8	7.13				8	9.925				5	9.74234
		9	11.39				9	19.409				6	12.3453
		10	7.64				10	13.857				7	13.1633
		11	7.98				11	14.238				8	11.0066
		12	9.74				12	19.396				9	5.35457
		13	7.56				13	10.293				10	8.66399
		14	9.38				14	16.451				11	20.3771
		15	8.35				15	9.409				12	12.903
		16	7.04				16	10.384				13	11.1554
		17	11.58				17	16.073				14	14.7994
		18	12.79				18	9.801				15	11.6387
		19	10.5				19	11.138				16	13.2377
		20	12.8				20	10.271				17	14.4648
	#2	1	12.23			#2	1	20.507			#3	1	15.915
		2	7.62				2	14.172				2	14.502
		3	11.08				3	19.917				3	26.0292
		4	6.73				4	13.016				4	18.7038
		5	10.26				5	10.612				5	8.14341
		6	7.92				6	13.1				6	15.6547
		7	12.2				7	10.766				7	31.9787
		8	26.62				8	10.556				8	26.1407
		9	10.34				9	15.846				9	12.8287
		10	7.66				10	20.764				10	15.8034
		11	15.06				11	9.322				11	12.6799
		12	10.93				12	16.525				12	8.51525
		13	11.6				13	13.05				13	6.7304
		14	8.7				14	10.635				14	11.4156
		15	8.03				15	9.524				15	15.8778
		16	7.85				16	9.063				16	16.2125
		17	10.71				17	9.051				17	11.4156
		18	11.01				18	9.934
		19	15.13				19	10.339
		20	11.68				20	11.355
	#3	1	7.81			#3	1	14.941
		2	12.2				2	13.004
		3	11.08				3	8.852
		4	8.07				4	9.633
		5	10.93				5	9.879
		6	7.51				6	16.316
		7	11.3				7	11.923
		8	10.41				8	9.263
		9	9.07				9	20.059
		10	9				10	16.316
		11	11.6				11	19.749
		12	8.7				12	19.463
		13	8.14				13	4.24
		14	8.63				14	7.38
		15	8.63				15	8.516
		16	12.68				16	8.686
		17	14.91				17	12.621
		18	8.92				18	11.568
		19	9.93				19	13.267
		20	11.56				20	8.043
