# Supplementary material for: EXOC1 plays an integral role in spermatogonia pseudopod elongation and spermatocyte stable syncytium formation in mice
Source: eLife. 2021 May 11;10:e59759. doi: 10.7554/eLife.59759 (PMC8112867; doi:10.7554/eLife.59759)
Supplement: Figure 4—source data 3. [file elife-59759-fig4-data3.xlsx]

## Sheet: Figure 4-source data 3
Intensity of active Rac1 signal in each cell
Genotype	Mouse	Intensity of active Rac1 signal
Exoc1flox/wt:: Nanos3+/Cre	#1	640.633
		1472.01
		646.042
		4785.3
		5513.08
		3204.87
		1851.99
		834.184
		1195.32
		1520.9
	#2	2638.04
		2428.04
		1133.91
		1226.14
		1658.07
		1172.3
		840.732
		1346.17
		1046.19
		1082.16
	#3	2723.34
		1321.08
		796.66
		818.189
		608.84
		1125.55
		833.022
		710.803
Exoc1 cKO	#1	3040.09
		4717.73
		8059.86
		8788.57
		2931.14
		5728.74
		5651.32
		7605.98
	#2	2117.67
		2934.98
		4084.41
		3050.41
		5523.76
		8305.61
		1958.02
		1406.51
		3492.46
		7740.72
	#3	2094.02
		2081.12
		3523.89
		2037.08
		1975.69
		1217.45
		3612.26
		1826.49
		1753.21
