# Supplementary material for: EXOC1 plays an integral role in spermatogonia pseudopod elongation and spermatocyte stable syncytium formation in mice
Source: eLife. 2021 May 11;10:e59759. doi: 10.7554/eLife.59759 (PMC8112867; doi:10.7554/eLife.59759)
Supplement: Figure 5—source data 1. [file elife-59759-fig5-data1.xlsx]

## Sheet: Figure 5-source data 1
The number of GFRα1+ and RARγ+ cells
Genotype	Mouse	Section #	# of GFRα1+ cells	# of RARγ+ cells
Exoc1flox/flox	#1	1	3	0
Exoc1flox/flox	#1	2	5	1
Exoc1flox/flox	#1	3	0	5
Exoc1flox/flox	#1	4	2	2
Exoc1flox/flox	#1	5	0	2
Exoc1flox/flox	#1	6	0	4
Exoc1flox/flox	#1	7	2	0
Exoc1flox/flox	#1	8	1	0
Exoc1flox/flox	#1	9	1	0
Exoc1flox/flox	#1	10	0	6
Exoc1flox/flox	#1	11	1	3
Exoc1flox/flox	#1	12	1	3
Exoc1flox/flox	#1	13	0	0
Exoc1flox/flox	#1	14	2	4
Exoc1flox/flox	#1	15	0	0
Exoc1flox/flox	#1	16	0	4
Exoc1flox/flox	#1	17	0	2
Exoc1flox/flox	#1	18	0	3
Exoc1flox/flox	#1	19	0	2
Exoc1flox/flox	#1	20	3	1
Exoc1flox/flox	#1	21	0	2
Exoc1flox/flox	#1	22	0	6
Exoc1flox/flox	#1	23	0	3
Exoc1flox/flox	#1	24	2	2
Exoc1flox/flox	#1	25	3	4
Exoc1flox/flox	#1	26	3	2
Exoc1flox/flox	#1	27	0	0
Exoc1flox/flox	#1	28	1	0
Exoc1flox/flox	#1	29	1	1
Exoc1flox/flox	#1	30	0	7
Exoc1flox/flox	#1	31	2	1
Exoc1flox/flox	#1	32	1	6
Exoc1flox/flox	#1	33	3	4
Exoc1flox/flox	#1	34	0	4
Exoc1flox/flox	#1	35	1	6
Exoc1flox/flox	#1	36	0	3
Exoc1flox/flox	#1	37	1	5
Exoc1flox/flox	#1	38	0	4
Exoc1flox/flox	#1	39	0	4
Exoc1flox/flox	#1	40	0	2
Exoc1flox/flox	#1	41	0	0
Exoc1flox/flox	#1	42	0	6
Exoc1flox/flox	#1	43	0	2
Exoc1flox/flox	#1	44	0	3
Exoc1flox/flox	#1	45	1	5
Exoc1flox/flox	#1	46	0	4
Exoc1flox/flox	#1	47	0	3
Exoc1flox/flox	#1	48	1	3
Exoc1flox/flox	#1	49	1	3
Exoc1flox/flox	#1	50	0	2
Exoc1flox/flox	#1	51	4	3
Exoc1flox/flox	#2	52	1	4
Exoc1flox/flox	#1	53	2	3
Exoc1flox/flox	#1	54	0	0
Exoc1flox/flox	#1	55	0	4
Exoc1flox/flox	#2	1	0	4
Exoc1flox/flox	#2	2	1	0
Exoc1flox/flox	#2	3	0	2
Exoc1flox/flox	#2	4	0	2
Exoc1flox/flox	#2	5	0	1
Exoc1flox/flox	#2	6	0	2
Exoc1flox/flox	#2	7	0	1
Exoc1flox/flox	#2	8	0	2
Exoc1flox/flox	#2	9	1	5
Exoc1flox/flox	#2	10	0	2
Exoc1flox/flox	#2	11	0	4
Exoc1flox/flox	#2	12	0	8
Exoc1flox/flox	#2	13	0	3
Exoc1flox/flox	#2	14	1	0
Exoc1flox/flox	#2	15	0	0
Exoc1flox/flox	#2	16	4	5
Exoc1flox/flox	#2	17	0	6
Exoc1flox/flox	#2	18	1	8
Exoc1flox/flox	#2	19	3	8
Exoc1flox/flox	#2	20	0	5
Exoc1flox/flox	#2	21	0	5
Exoc1flox/flox	#2	22	0	0
Exoc1flox/flox	#2	23	0	6
Exoc1flox/flox	#2	24	3	2
Exoc1flox/flox	#2	25	2	5
Exoc1flox/flox	#2	26	1	3
Exoc1flox/flox	#2	27	0	1
Exoc1flox/flox	#2	28	1	0
Exoc1flox/flox	#2	29	2	0
Exoc1flox/flox	#2	30	0	5
Exoc1flox/flox	#2	31	0	2
Exoc1flox/flox	#2	32	0	5
Exoc1flox/flox	#2	33	0	5
Exoc1flox/flox	#2	34	1	3
Exoc1flox/flox	#2	35	0	3
Exoc1flox/flox	#2	36	1	2
Exoc1flox/flox	#2	37	0	0
Exoc1flox/flox	#2	38	1	0
Exoc1flox/flox	#2	39	0	4
Exoc1flox/flox	#2	40	0	5
Exoc1flox/flox	#2	41	3	4
Exoc1flox/flox	#2	42	0	3
Exoc1flox/flox	#2	43	0	7
Exoc1flox/flox	#2	44	0	5
Exoc1flox/flox	#2	45	0	4
Exoc1flox/flox	#2	46	0	4
Exoc1flox/flox	#2	47	0	3
Exoc1flox/flox	#3	48	0	2
Exoc1flox/flox	#2	49	1	7
Exoc1flox/flox	#2	50	0	0
Exoc1flox/flox	#2	51	1	3
Exoc1flox/flox	#2	52	2	0
Exoc1flox/flox	#2	53	3	0
Exoc1flox/flox	#2	54	0	0
Exoc1flox/flox	#2	55	2	0
Exoc1flox/flox	#3	1	0	2
Exoc1flox/flox	#3	2	0	2
Exoc1flox/flox	#3	3	2	4
Exoc1flox/flox	#3	4	0	1
Exoc1flox/flox	#3	5	2	6
Exoc1flox/flox	#3	6	0	7
Exoc1flox/flox	#3	7	1	0
Exoc1flox/flox	#3	8	0	0
Exoc1flox/flox	#3	9	0	4
Exoc1flox/flox	#3	10	0	9
Exoc1flox/flox	#3	11	0	6
Exoc1flox/flox	#3	12	0	3
Exoc1flox/flox	#3	13	2	4
Exoc1flox/flox	#3	14	0	0
Exoc1flox/flox	#3	15	2	0
Exoc1flox/flox	#3	16	0	5
Exoc1flox/flox	#3	17	0	4
Exoc1flox/flox	#3	18	0	8
Exoc1flox/flox	#3	19	0	0
Exoc1flox/flox	#3	20	0	2
Exoc1flox/flox	#3	21	0	4
Exoc1flox/flox	#3	22	0	5
Exoc1flox/flox	#3	23	0	2
Exoc1flox/flox	#3	24	0	4
Exoc1flox/flox	#3	25	0	3
Exoc1flox/flox	#3	26	0	1
Exoc1flox/flox	#3	27	2	2
Exoc1flox/flox	#3	28	2	0
Exoc1flox/flox	#3	29	4	3
Exoc1flox/flox	#3	30	0	0
Exoc1flox/flox	#3	31	0	1
Exoc1flox/flox	#3	32	0	2
Exoc1flox/flox	#3	33	2	0
Exoc1flox/flox	#3	34	0	2
Exoc1flox/flox	#3	35	1	5
Exoc1flox/flox	#3	36	2	0
Exoc1flox/flox	#3	37	0	5
Exoc1flox/flox	#3	38	0	1
Exoc1flox/flox	#3	39	0	0
Exoc1flox/flox	#3	40	0	4
Exoc1flox/flox	#3	41	0	2
Exoc1flox/flox	#3	42	0	3
Exoc1flox/flox	#3	43	0	2
Exoc1flox/flox	#3	44	0	3
Exoc1flox/flox	#3	45	3	0
Exoc1flox/flox	#3	46	0	3
Exoc1flox/flox	#3	47	0	2
Exoc1flox/flox	#3	48	0	3
Exoc1flox/flox	#3	49	0	1
Exoc1flox/flox	#3	50	3	0
Exoc1flox/flox	#3	51	0	3
Exoc1flox/flox	#3	52	0	5
Exoc1flox/flox	#3	53	2	0
Exoc1flox/flox	#3	54	2	1
Exoc1 cKO	#1	1	0	4
Exoc1 cKO	#1	2	1	2
Exoc1 cKO	#1	3	1	0
Exoc1 cKO	#1	4	2	0
Exoc1 cKO	#1	5	2	1
Exoc1 cKO	#1	6	2	0
Exoc1 cKO	#1	7	0	1
Exoc1 cKO	#1	8	2	1
Exoc1 cKO	#1	9	0	3
Exoc1 cKO	#1	10	1	0
Exoc1 cKO	#1	11	1	3
Exoc1 cKO	#1	12	5	0
Exoc1 cKO	#1	13	0	1
Exoc1 cKO	#1	14	3	0
Exoc1 cKO	#1	15	0	2
Exoc1 cKO	#1	16	3	3
Exoc1 cKO	#1	17	0	0
Exoc1 cKO	#1	18	4	0
Exoc1 cKO	#1	19	3	0
Exoc1 cKO	#1	20	3	2
Exoc1 cKO	#1	21	4	4
Exoc1 cKO	#1	22	4	6
Exoc1 cKO	#1	23	0	3
Exoc1 cKO	#1	24	2	0
Exoc1 cKO	#1	25	1	0
Exoc1 cKO	#1	26	0	0
Exoc1 cKO	#1	27	3	1
Exoc1 cKO	#1	28	1	1
Exoc1 cKO	#1	29	0	0
Exoc1 cKO	#1	30	0	0
Exoc1 cKO	#1	31	4	3
Exoc1 cKO	#1	32	1	1
Exoc1 cKO	#1	33	0	1
Exoc1 cKO	#1	34	0	0
Exoc1 cKO	#1	35	3	4
Exoc1 cKO	#1	36	0	2
Exoc1 cKO	#1	37	0	1
Exoc1 cKO	#1	38	2	0
Exoc1 cKO	#1	39	4	3
Exoc1 cKO	#1	40	4	4
Exoc1 cKO	#1	41	0	2
Exoc1 cKO	#1	42	4	0
Exoc1 cKO	#1	43	0	5
Exoc1 cKO	#1	44	1	0
Exoc1 cKO	#1	45	2	1
Exoc1 cKO	#1	46	1	0
Exoc1 cKO	#2	1	0	5
Exoc1 cKO	#2	2	1	4
Exoc1 cKO	#2	3	1	2
Exoc1 cKO	#2	4	0	5
Exoc1 cKO	#2	5	2	0
Exoc1 cKO	#2	6	1	0
Exoc1 cKO	#2	7	1	0
Exoc1 cKO	#2	8	2	0
Exoc1 cKO	#2	9	2	0
Exoc1 cKO	#2	10	2	0
Exoc1 cKO	#2	11	1	3
Exoc1 cKO	#2	12	0	3
Exoc1 cKO	#2	13	1	2
Exoc1 cKO	#2	14	0	5
Exoc1 cKO	#2	15	1	3
Exoc1 cKO	#2	16	4	0
Exoc1 cKO	#2	17	0	0
Exoc1 cKO	#2	18	0	0
Exoc1 cKO	#2	19	1	0
Exoc1 cKO	#2	20	1	0
Exoc1 cKO	#2	21	0	0
Exoc1 cKO	#2	22	1	0
Exoc1 cKO	#2	23	1	1
Exoc1 cKO	#2	24	1	0
Exoc1 cKO	#2	25	4	2
Exoc1 cKO	#2	26	0	2
Exoc1 cKO	#2	27	7	2
Exoc1 cKO	#2	28	2	1
Exoc1 cKO	#2	29	2	1
Exoc1 cKO	#2	30	1	1
Exoc1 cKO	#2	31	2	0
Exoc1 cKO	#2	32	1	0
Exoc1 cKO	#2	33	4	3
Exoc1 cKO	#2	34	0	4
Exoc1 cKO	#2	35	0	5
Exoc1 cKO	#2	36	2	1
Exoc1 cKO	#2	37	3	4
Exoc1 cKO	#2	38	1	0
Exoc1 cKO	#2	39	0	1
Exoc1 cKO	#2	40	3	5
Exoc1 cKO	#2	41	0	0
Exoc1 cKO	#2	42	2	1
Exoc1 cKO	#2	43	2	1
Exoc1 cKO	#2	44	0	1
Exoc1 cKO	#2	45	0	4
Exoc1 cKO	#2	46	2	1
Exoc1 cKO	#2	47	5	0
Exoc1 cKO	#2	48	0	2
Exoc1 cKO	#2	49	1	0
Exoc1 cKO	#2	50	2	0
Exoc1 cKO	#2	51	1	0
Exoc1 cKO	#2	52	5	4
Exoc1 cKO	#2	53	0	4
Exoc1 cKO	#2	54	0	1
Exoc1 cKO	#2	55	6	0
Exoc1 cKO	#2	56	4	0
Exoc1 cKO	#2	57	1	1
Exoc1 cKO	#2	58	0	2
Exoc1 cKO	#2	59	1	0
Exoc1 cKO	#2	60	3	3
Exoc1 cKO	#2	61	0	0
Exoc1 cKO	#2	62	2	0
Exoc1 cKO	#2	63	0	3
Exoc1 cKO	#2	64	0	3
Exoc1 cKO	#2	65	6	0
Exoc1 cKO	#2	66	1	2
Exoc1 cKO	#2	67	0	4
Exoc1 cKO	#2	68	0	3
Exoc1 cKO	#2	69	2	0
Exoc1 cKO	#2	70	1	4
Exoc1 cKO	#2	71	1	0
Exoc1 cKO	#2	72	1	0
Exoc1 cKO	#2	73	4	0
Exoc1 cKO	#2	74	2	0
Exoc1 cKO	#2	75	1	0
Exoc1 cKO	#2	76	0	0
Exoc1 cKO	#2	77	1	2
Exoc1 cKO	#2	78	2	0
Exoc1 cKO	#2	79	2	0
Exoc1 cKO	#2	80	0	4
Exoc1 cKO	#2	81	2	0
Exoc1 cKO	#2	82	0	0
Exoc1 cKO	#2	83	1	2
Exoc1 cKO	#2	84	0	0
Exoc1 cKO	#2	85	1	1
Exoc1 cKO	#2	86	0	3
Exoc1 cKO	#2	87	0	4
Exoc1 cKO	#3	1	0	7
Exoc1 cKO	#3	2	0	8
Exoc1 cKO	#3	3	0	2
Exoc1 cKO	#3	4	0	1
Exoc1 cKO	#3	5	0	1
Exoc1 cKO	#3	6	2	0
Exoc1 cKO	#3	7	0	2
Exoc1 cKO	#3	8	1	0
Exoc1 cKO	#3	9	3	0
Exoc1 cKO	#3	10	0	0
Exoc1 cKO	#3	11	0	4
Exoc1 cKO	#3	12	0	3
Exoc1 cKO	#3	13	4	0
Exoc1 cKO	#3	14	1	3
Exoc1 cKO	#3	15	0	3
Exoc1 cKO	#3	16	5	0
Exoc1 cKO	#3	17	1	0
Exoc1 cKO	#3	18	0	1
Exoc1 cKO	#3	19	1	3
Exoc1 cKO	#3	20	0	2
Exoc1 cKO	#3	21	1	1
Exoc1 cKO	#3	22	2	3
Exoc1 cKO	#3	23	9	6
Exoc1 cKO	#3	24	3	0
Exoc1 cKO	#3	25	4	0
Exoc1 cKO	#3	26	4	0
Exoc1 cKO	#3	27	0	3
Exoc1 cKO	#3	28	0	2
Exoc1 cKO	#3	29	1	0
Exoc1 cKO	#3	30	2	0
Exoc1 cKO	#3	31	3	0
Exoc1 cKO	#3	32	0	0
Exoc1 cKO	#3	33	2	1
Exoc1 cKO	#3	34	1	0
Exoc1 cKO	#3	35	2	0
Exoc1 cKO	#3	36	2	0
Exoc1 cKO	#3	37	3	0
Exoc1 cKO	#3	38	0	5
Exoc1 cKO	#3	39	1	0
Exoc1 cKO	#3	40	0	0
Exoc1 cKO	#3	41	7	2
Exoc1 cKO	#3	42	3	0
Exoc1 cKO	#3	43	2	0
Exoc1 cKO	#3	44	1	4
Exoc1 cKO	#3	45	2	0
Exoc1 cKO	#3	46	2	2
Exoc1 cKO	#3	47	1	0
Exoc1 cKO	#3	48	1	0
Exoc1 cKO	#3	49	1	0
Exoc1 cKO	#3	50	4	0
Exoc1 cKO	#3	51	0	3
Exoc1 cKO	#3	52	2	0
Exoc1 cKO	#3	53	6	2
Exoc1 cKO	#3	54	1	3
Exoc1 cKO	#3	55	0	6
