# Supplementary material for: EXOC1 plays an integral role in spermatogonia pseudopod elongation and spermatocyte stable syncytium formation in mice
Source: eLife. 2021 May 11;10:e59759. doi: 10.7554/eLife.59759 (PMC8112867; doi:10.7554/eLife.59759)
Supplement: Figure 5—source data 2. [file elife-59759-fig5-data2.xlsx]

## Sheet: Figure 5-source data 2
The number of c-Kit+ cells
Genotype	Mouse	Section #	# of c-Kit+ cells
Exoc1flox/flox	#1	1	30
Exoc1flox/flox	#1	2	41
Exoc1flox/flox	#1	3	24
Exoc1flox/flox	#1	4	45
Exoc1flox/flox	#1	5	45
Exoc1flox/flox	#1	6	31
Exoc1flox/flox	#1	7	45
Exoc1flox/flox	#1	8	35
Exoc1flox/flox	#1	9	28
Exoc1flox/flox	#1	10	37
Exoc1flox/flox	#1	11	27
Exoc1flox/flox	#1	12	32
Exoc1flox/flox	#1	13	34
Exoc1flox/flox	#1	14	38
Exoc1flox/flox	#1	15	46
Exoc1flox/flox	#1	16	26
Exoc1flox/flox	#1	17	45
Exoc1flox/flox	#1	18	41
Exoc1flox/flox	#1	19	24
Exoc1flox/flox	#1	20	33
Exoc1flox/flox	#2	1	45
Exoc1flox/flox	#2	2	44
Exoc1flox/flox	#2	3	34
Exoc1flox/flox	#2	4	35
Exoc1flox/flox	#2	5	35
Exoc1flox/flox	#2	6	42
Exoc1flox/flox	#2	7	46
Exoc1flox/flox	#2	8	42
Exoc1flox/flox	#2	9	49
Exoc1flox/flox	#2	10	36
Exoc1flox/flox	#2	11	15
Exoc1flox/flox	#2	12	8
Exoc1flox/flox	#2	13	36
Exoc1flox/flox	#2	14	46
Exoc1flox/flox	#2	15	9
Exoc1flox/flox	#2	16	48
Exoc1flox/flox	#2	17	31
Exoc1flox/flox	#2	18	37
Exoc1flox/flox	#2	19	4
Exoc1flox/flox	#2	20	3
Exoc1flox/flox	#3	1	4
Exoc1flox/flox	#3	2	2
Exoc1flox/flox	#3	3	5
Exoc1flox/flox	#3	4	38
Exoc1flox/flox	#3	5	34
Exoc1flox/flox	#3	6	63
Exoc1flox/flox	#3	7	38
Exoc1flox/flox	#3	8	54
Exoc1flox/flox	#3	9	1
Exoc1flox/flox	#3	10	17
Exoc1flox/flox	#3	11	2
Exoc1flox/flox	#3	12	14
Exoc1flox/flox	#3	13	38
Exoc1flox/flox	#3	14	23
Exoc1flox/flox	#3	15	26
Exoc1flox/flox	#3	16	32
Exoc1flox/flox	#3	17	3
Exoc1flox/flox	#3	18	10
Exoc1flox/flox	#3	19	5
Exoc1flox/flox	#3	20	8
Exoc1 cKO	#1	1	4
Exoc1 cKO	#1	2	4
Exoc1 cKO	#1	3	3
Exoc1 cKO	#1	4	1
Exoc1 cKO	#1	5	3
Exoc1 cKO	#1	6	4
Exoc1 cKO	#1	7	1
Exoc1 cKO	#1	8	2
Exoc1 cKO	#1	9	2
Exoc1 cKO	#1	10	2
Exoc1 cKO	#1	11	1
Exoc1 cKO	#1	12	6
Exoc1 cKO	#1	13	2
Exoc1 cKO	#1	14	2
Exoc1 cKO	#1	15	2
Exoc1 cKO	#1	16	3
Exoc1 cKO	#1	17	3
Exoc1 cKO	#1	18	3
Exoc1 cKO	#1	19	3
Exoc1 cKO	#1	20	1
Exoc1 cKO	#2	1	21
Exoc1 cKO	#2	2	5
Exoc1 cKO	#2	3	8
Exoc1 cKO	#2	4	4
Exoc1 cKO	#2	5	1
Exoc1 cKO	#2	6	11
Exoc1 cKO	#2	7	6
Exoc1 cKO	#2	8	7
Exoc1 cKO	#2	9	4
Exoc1 cKO	#2	10	13
Exoc1 cKO	#2	11	1
Exoc1 cKO	#2	12	3
Exoc1 cKO	#2	13	4
Exoc1 cKO	#2	14	3
Exoc1 cKO	#2	15	3
Exoc1 cKO	#2	16	8
Exoc1 cKO	#2	17	1
Exoc1 cKO	#2	18	5
Exoc1 cKO	#2	19	3
Exoc1 cKO	#2	20	2
Exoc1 cKO	#3	1	3
Exoc1 cKO	#3	2	22
Exoc1 cKO	#3	3	42
Exoc1 cKO	#3	4	1
Exoc1 cKO	#3	5	2
Exoc1 cKO	#3	6	8
Exoc1 cKO	#3	7	7
Exoc1 cKO	#3	8	6
Exoc1 cKO	#3	9	3
Exoc1 cKO	#3	10	5
Exoc1 cKO	#3	11	19
Exoc1 cKO	#3	12	8
Exoc1 cKO	#3	13	18
Exoc1 cKO	#3	14	13
Exoc1 cKO	#3	15	14
Exoc1 cKO	#3	16	12
Exoc1 cKO	#3	17	16
Exoc1 cKO	#3	18	3
Exoc1 cKO	#3	19	8
Exoc1 cKO	#3	20	1
