# Supplementary material for: EXOC1 plays an integral role in spermatogonia pseudopod elongation and spermatocyte stable syncytium formation in mice
Source: eLife. 2021 May 11;10:e59759. doi: 10.7554/eLife.59759 (PMC8112867; doi:10.7554/eLife.59759)
Supplement: Supplementary file 1. — (a) Differentiating spermatogonia are not aggregated. Examination of aggregated Kit+ differentiating spermatogonia in adult Exoc1 cKO mice. Aggregation was determined by observation of immunofluorescence images with anti-Kit antibody. (b) Primers for genotyping The following is a list of primers used for genotyping or vector construction. [file elife-59759-supp1.xlsx]

## Sheet: Supplementary File 1a
			Supplementary File 1a. Differentiating Spermatogonia are not Aggregated.
			Number of	Exoc1 cKO
				Mouse 1	Mouse 2	Mouse 3
			Aggregated Kit-positive cells	0	0	0
			Non-Aggregated Kit-positive cells	85	51	78

## Sheet: Supplementary File 1b
	Supplementary File 1b. Primers for genotyping
	Experiment	Primer Name	Sequence
	Exoc1PA-C genotyping	Exoc1 3F screening F	ATGGAGTCATCCCCTCACAG
		Exoc1 3F screening R	GTCCCTGGAAAGTGCTGAAG
	Exoc1PA-N genotyping	Exoc1 5F screening F	CTTGAAGCCCCATGCTTTTA
		Exoc1 5F screening R	GATGCAGGATCCCAGACACT
	Exoc1flox genotyping Exoc1cKO genotyping	Exoc1-cKO genotyping n3-1	GGAAAACCCGGAATTTGATT
		Exoc1-cKO genotyping n3-2	CCTTGCACACCAATGAGCTA
		Exoc1-cKO genotyping n3-3	CCGGATTGATGGTAGTGGTC
	Snap23flox genotyping	Snap23-Genotyping-1	TGCAGGAATCAAGACCATCA
		Snap23-Genotyping-2	CAGCATGTGAGGGTTGCTTA
	Snap23cKO genotyping	Snap23-Genotyping-1	TGCAGGAATCAAGACCATCA
		Snap23-Genotyping-6	GCCTTTGAGTGACAAGCTCA
	Stx2KO genotyping	Stx2 QC primer Long F	CAGGTGTTTGAGAAAGTGGGGATAGCTT
		Stx2 QC primer Long R	TAAAACTGACGACTAAGAAGCCCCAACC
		Stx2 QC primer Short F	AACACGTAAGGCCCATGTTC
		Stx2 QC primer Short R	AACCTGGGTCCTTCGTATCC
	Construction of Exoc1 expression vector	Exoc1 full length RT-F	ATGACAGCAATCAAGCATGCGCTGCAGAGA
		Exoc1 full length RT-R	GTGGGACTGTGCGATGCTGGAGCAATA
	Construction of Snap23 expression vector	Snap23 full length RT-F	ATGGATAATCTGTCCCCAGAGGA
		Snap23 full length RT-F	ACTATCAATGAGTTTCTTTGCTCTTGTA
	Construction of Stx2 expression vector	Stx2 full length RT-F	ATGCGGGACCGGCTGCCC
		Stx2 full length RT-F	GACAATGCTGTTGCGAGAATAATTCCA
